# Supplementary material for: Functional Characterization of Potato UBC13-UEV1s Genes Required for Ubiquitin Lys63 Chain to Polyubiquitination
Source: MDPI journal article supplement (doi:10.3390/ijms24032412), 2023-01-26
Supplement: s1 [file s1]

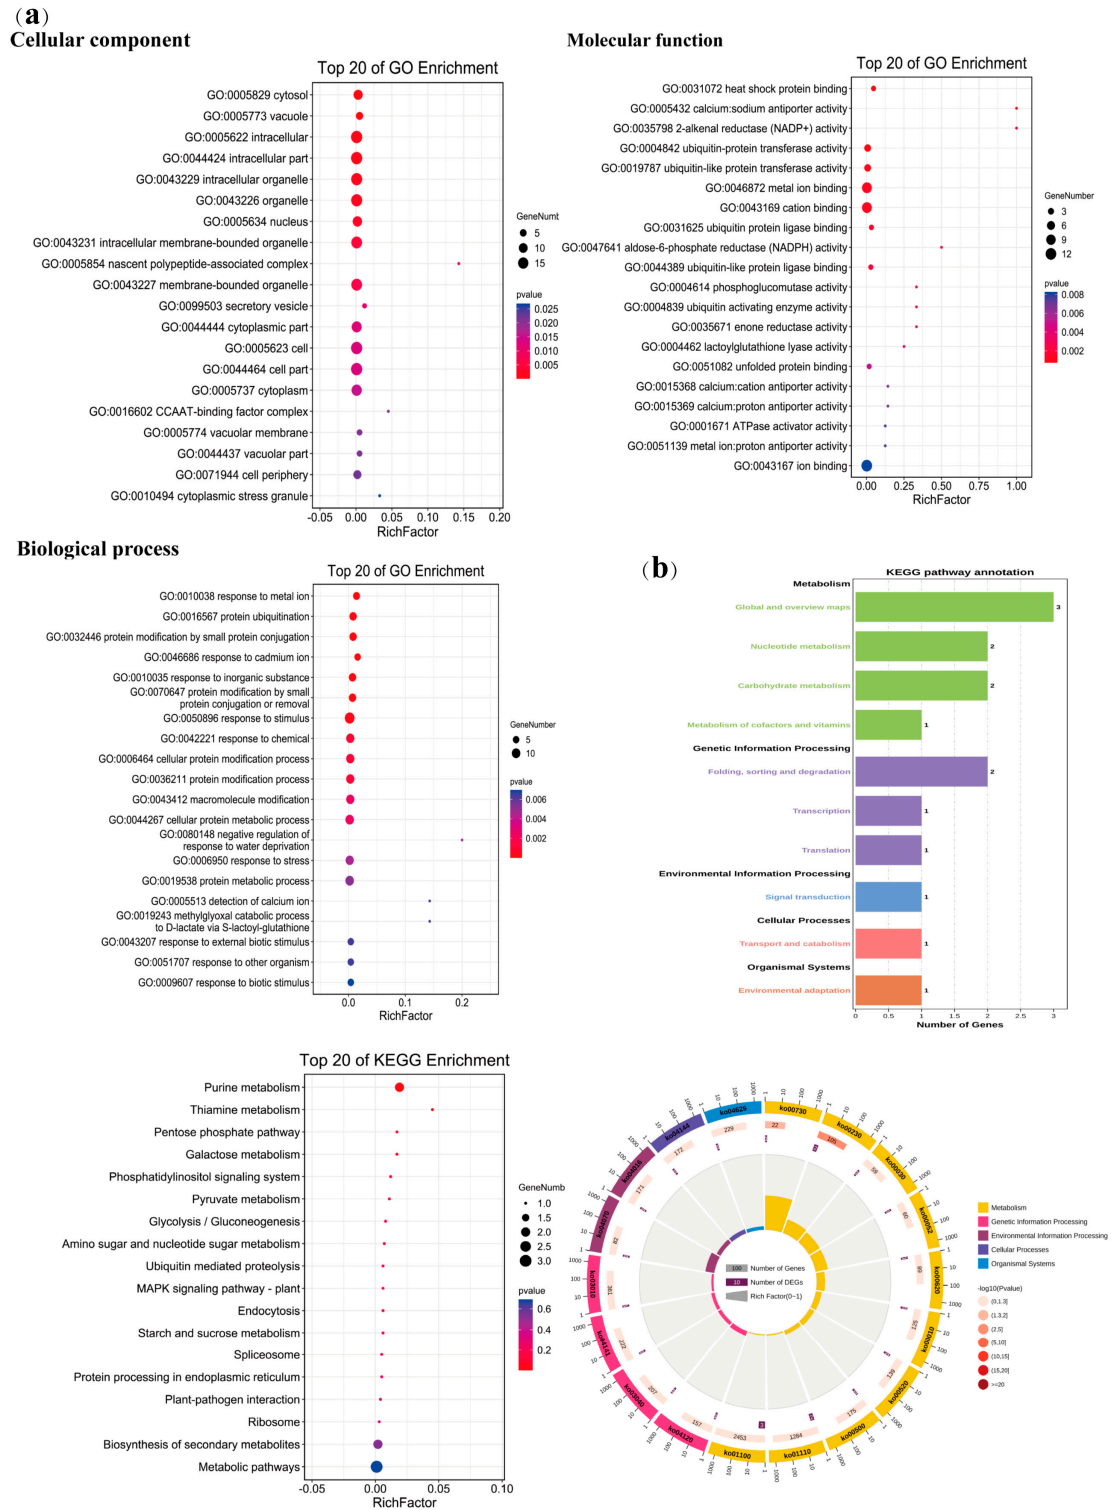

**Table S1** List of the *cis*-acting element information.

| Gene       | motif       | sequence               | position | Strand | Function                                                             |
|------------|-------------|------------------------|----------|--------|----------------------------------------------------------------------|
| StCOP10    | CGTCA-motif | CGTCA                  | 133      | -      | cis-acting regulatory element involved in the MeJA-responsiveness    |
|            | CGTCA-motif | CGTCA                  | 287      | +      | cis-acting regulatory element involved in the MeJA-responsiveness    |
|            | CGTCA-motif | CGTCA                  | 592      | -      | cis-acting regulatory element involved in the MeJA-responsiveness    |
|            | circadian   | CAAAGATATC             | 862      | -      | cis-acting regulatory element involved in circadian control          |
|            | ARE         | AAACCA                 | 396      | -      | cis-acting regulatory element essential for the anaerobic induction  |
|            | ARE         | AAACCA                 | 452      | +      | cis-acting regulatory element essential for the anaerobic induction  |
|            | ARE         | AAACCA                 | 1160     | +      | cis-acting regulatory element essential for the anaerobic induction  |
|            | TGACG-motif | TGACG                  | 133      | +      | cis-acting regulatory element involved in the MeJA-responsiveness    |
|            | TGACG-motif | TGACG                  | 287      | -      | cis-acting regulatory element involved in the MeJA-responsiveness    |
|            | TGACG-motif | TGACG                  | 592      | +      | cis-acting regulatory element involved in the MeJA-responsiveness    |
|            | P-box       | CCTTTTG                | 2014     | -      | gibberellin-responsive element                                       |
|            | TGA-element | AACGAC                 | 1923     | +      | auxin-responsive element                                             |
| StELC-like | ABRE        | ACGTG                  | 389      | +      | cis-acting element involved in the abscisic acid responsiveness      |
|            | ABRE        | ACGTG                  | 1061     | +      | cis-acting element involved in the abscisic acid responsiveness      |
|            | WUN-motif   | AAATTTCT               | 457      | -      | wound-responsive element                                             |
|            | TCA-element | CCATCTTTT              | 1882     | -      | cis-acting element involved in salicylic acid responsiveness         |
|            | AuxRE       | TGTCTCAATAAG           | 1919     | -      | part of an auxin-responsive element                                  |
|            | O2-site     | GATGA(C/T)(A/G)TG(A/G) | 385      | +      | cis-acting regulatory element involved in zein metabolism regulation |
|            | TGACG-motif | TGACG                  | 387      | +      | cis-acting regulatory element involved in the MeJA-responsiveness    |
|            | CGTCA-motif | CGTCA                  | 387      | -      | cis-acting regulatory element involved in the MeJA-responsiveness    |
|            | GCN4_motif  | TGAGTCA                | 689      | +      | cis-regulatory element involved in endosperm expression              |
|            | LTR         | CCGAAA                 | 314      | -      | cis-acting element involved in low-temperature responsiveness        |
|            | TGA-element | AACGAC                 | 1184     | -      | auxin-responsive element                                             |

|             |                 |            |      |   |                                                                     |
|-------------|-----------------|------------|------|---|---------------------------------------------------------------------|
|             | TGA-element     | AACGAC     | 2080 | - | auxin-responsive element                                            |
|             | TC-rich repeats | GTTTTCTTAC | 295  | + | cis-acting element involved in defense and stress responsiveness    |
|             | ARE             | AAACCA     | 325  | + | cis-acting regulatory element essential for the anaerobic induction |
|             | ARE             | AAACCA     | 369  | - | cis-acting regulatory element essential for the anaerobic induction |
|             | CAT-box         | GCCACT     | 41   | - | cis-acting regulatory element related to meristem expression        |
|             | CAT-box         | GCCACT     | 120  | + | cis-acting regulatory element related to meristem expression        |
|             | CAT-box         | GCCACT     | 1134 | + | cis-acting regulatory element related to meristem expression        |
| StELC-like2 | GCN4_motif      | TGAGTCA    | 1360 | - | cis-regulatory element involved in endosperm expression             |
|             | GCN4_motif      | TGAGTCA    | 1877 | + | cis-regulatory element involved in endosperm expression             |
|             | TATC-box        | TATCCCA    | 1299 | + | cis-acting element involved in gibberellin-responsiveness           |
|             | TGA-element     | AACGAC     | 1355 | - | auxin-responsive element                                            |
|             | TGA-element     | AACGAC     | 1763 | + | auxin-responsive element                                            |
|             | TC-rich repeats | GTTTTCTTAC | 791  | + | cis-acting element involved in defense and stress responsiveness    |
|             | ABRE            | ACGTG      | 1670 | + | cis-acting element involved in the abscisic acid responsiveness     |
|             | TGACG-motif     | TGACG      | 1557 | + | cis-acting regulatory element involved in the MeJA-responsiveness   |
| StUEV1B     | ABRE            | CACGTG     | 86   | + | cis-acting element involved in the abscisic acid responsiveness     |
|             | ABRE            | ACGTG      | 87   | + | cis-acting element involved in the abscisic acid responsiveness     |
|             | ABRE            | ACGTG      | 398  | + | cis-acting element involved in the abscisic acid responsiveness     |
|             | ABRE            | TACGGTC    | 411  | - | cis-acting element involved in the abscisic acid responsiveness     |
|             | ABRE            | ACGTG      | 1205 | - | cis-acting element involved in the abscisic acid responsiveness     |
|             | P-box           | CCTTTTG    | 1939 | + | gibberellin-responsive element                                      |
|             | ARE             | AAACCA     | 969  | + | cis-acting regulatory element essential for the anaerobic induction |
|             | ARE             | AAACCA     | 1451 | - | cis-acting regulatory element essential for the anaerobic induction |
|             | ARE             | AAACCA     | 1944 | - | cis-acting regulatory element essential for the anaerobic induction |
|             | MBS             | CAACTG     | 178  | + | MYB binding site involved in drought-inducibility                   |

|               |             |           |      |   |                                                                     |
|---------------|-------------|-----------|------|---|---------------------------------------------------------------------|
| StUEV1D-like  | ARE         | AAACCA    | 412  | - | cis-acting regulatory element essential for the anaerobic induction |
|               | P-box       | CCTTTTG   | 1532 | + | gibberellin-responsive element                                      |
|               | GA-motif    | ATAGATAA  | 474  | + | part of a light responsive element                                  |
|               | WUN-motif   | AAATTCCT  | 481  | - | wound-responsive element                                            |
|               | TCA-element | CCATCTTTT | 942  | + | cis-acting element involved in salicylic acid responsiveness        |
|               | TGACG-motif | TGACG     | 1211 | + | cis-acting regulatory element involved in the MeJA-responsiveness   |
|               | CGTCA-motif | CGTCA     | 1211 | - | cis-acting regulatory element involved in the MeJA-responsiveness   |
| StUEV1D-like1 | GARE-motif  | TCTGTTG   | 1553 | - | gibberellin-responsive element                                      |
|               | ARE         | AAACCA    | 1575 | + | cis-acting regulatory element essential for the anaerobic induction |
|               | ARE         | AAACCA    | 1919 | + | cis-acting regulatory element essential for the anaerobic induction |
|               | CCAAT-box   | CAACGG    | 1897 | + | MYBHv1 binding site                                                 |
|               | MBS         | CAACTG    | 584  | - | MYB binding site involved in drought-inducibility                   |
|               | TGA-element | AACGAC    | 766  | - | auxin-responsive element                                            |
|               | CGTCA-motif | CGTCA     | 1602 | + | cis-acting regulatory element involved in the MeJA-responsiveness   |
|               | CGTCA-motif | CGTCA     | 1776 | - | cis-acting regulatory element involved in the MeJA-responsiveness   |
|               | CGTCA-motif | CGTCA     | 1946 | + | cis-acting regulatory element involved in the MeJA-responsiveness   |
|               | TGA-box     | TGACGTAA  | 1943 | - | part of an auxin-responsive element                                 |
|               | TGACG-motif | TGACG     | 1602 | - | cis-acting regulatory element involved in the MeJA-responsiveness   |
|               | TGACG-motif | TGACG     | 1776 | + | cis-acting regulatory element involved in the MeJA-responsiveness   |
|               | TGACG-motif | TGACG     | 1946 | - | cis-acting regulatory element involved in the MeJA-responsiveness   |
|               | ABRE        | ACGTG     | 255  | + | cis-acting element involved in the abscisic acid responsiveness     |
|               | ABRE        | ACGTG     | 427  | + | cis-acting element involved in the abscisic acid responsiveness     |
|               | GC-motif    | CCCCCG    | 1035 | - | enhancer-like element involved in anoxic specific inducibility      |
|               | ARE         | AAACCA    | 313  | - | cis-acting regulatory element essential for the anaerobic induction |
|               | ARE         | AAACCA    | 770  | + | cis-acting regulatory element essential for the anaerobic induction |

|             |                 |            |      |   |                                                                     |
|-------------|-----------------|------------|------|---|---------------------------------------------------------------------|
| StVPS23/ELC | TC-rich repeats | GTTTTCTTAC | 315  | + | cis-acting element involved in defense and stress responsiveness    |
|             | TC-rich repeats | GTTTTCTTAC | 521  | - | cis-acting element involved in defense and stress responsiveness    |
|             | TC-rich repeats | ATTCTCTAAC | 764  | + | cis-acting element involved in defense and stress responsiveness    |
|             | LTR             | CCGAAA     | 958  | + | cis-acting element involved in low-temperature responsiveness       |
|             | TGA-element     | AACGAC     | 388  | + | auxin-responsive element                                            |
|             | MBS             | CAACTG     | 612  | - | MYB binding site involved in drought-inducibility                   |
|             | CGTCA-motif     | CGTCA      | 1959 | - | cis-acting regulatory element involved in the MeJA-responsiveness   |
|             | TGACG-motif     | TGACG      | 1959 | + | cis-acting regulatory element involved in the MeJA-responsiveness   |
|             | TCA-element     | TCAGAAGAGG | 465  | + | cis-acting element involved in salicylic acid responsiveness        |
|             | ABRE            | CACGTG     | 1204 | - | cis-acting element involved in the abscisic acid responsiveness     |
|             | ABRE            | ACGTG      | 1205 | + | cis-acting element involved in the abscisic acid responsiveness     |
|             | ABRE            | ACGTG      | 1941 | + | cis-acting element involved in the abscisic acid responsiveness     |
| StUBC13A    | ABRE            | AACCCGG    | 1057 | + | cis-acting element involved in the abscisic acid responsiveness     |
|             | ARE             | AAACCA     | 1081 | - | cis-acting regulatory element essential for the anaerobic induction |
|             | ARE             | AAACCA     | 1086 | - | cis-acting regulatory element essential for the anaerobic induction |
|             | ARE             | AAACCA     | 1096 | - | cis-acting regulatory element essential for the anaerobic induction |
|             | ARE             | AAACCA     | 1101 | - | cis-acting regulatory element essential for the anaerobic induction |
|             | ARE             | AAACCA     | 1136 | - | cis-acting regulatory element essential for the anaerobic induction |
|             | ARE             | AAACCA     | 1141 | - | cis-acting regulatory element essential for the anaerobic induction |
|             | ARE             | AAACCA     | 1157 | + | cis-acting regulatory element essential for the anaerobic induction |
|             | ARE             | AAACCA     | 1173 | + | cis-acting regulatory element essential for the anaerobic induction |
|             | ARE             | AAACCA     | 1467 | - | cis-acting regulatory element essential for the anaerobic induction |
|             | ARE             | AAACCA     | 1854 | - | cis-acting regulatory element essential for the anaerobic induction |
|             | ARE             | AAACCA     | 1859 | - | cis-acting regulatory element essential for the anaerobic induction |
|             | ARE             | AAACCA     | 1894 | - | cis-acting regulatory element essential for the anaerobic induction |

|               |             |               |      |   |                                                                     |
|---------------|-------------|---------------|------|---|---------------------------------------------------------------------|
|               | ARE         | AAACCA        | 1899 | - | cis-acting regulatory element essential for the anaerobic induction |
|               | LTR         | CCGAAA        | 1791 | + | cis-acting element involved in low-temperature responsiveness       |
|               | LTR         | CCGAAA        | 1801 | + | cis-acting element involved in low-temperature responsiveness       |
|               | LTR         | CCGAAA        | 1809 | + | cis-acting element involved in low-temperature responsiveness       |
|               | LTR         | CCGAAA        | 1818 | + | cis-acting element involved in low-temperature responsiveness       |
| StUBC13A-like | A-box       | CCGTCC        | 968  | + | cis-acting regulatory element                                       |
|               | ABRE        | ACGTG         | 648  | + | cis-acting element involved in the abscisic acid responsiveness     |
|               | ABRE        | ACGTG         | 1278 | + | cis-acting element involved in the abscisic acid responsiveness     |
|               | ABRE        | ACGTG         | 1541 | - | cis-acting element involved in the abscisic acid responsiveness     |
|               | ARE         | AAACCA        | 1079 | + | cis-acting regulatory element essential for the anaerobic induction |
|               | ARE         | AAACCA        | 1561 | - | cis-acting regulatory element essential for the anaerobic induction |
|               | ARE         | AAACCA        | 1918 | - | cis-acting regulatory element essential for the anaerobic induction |
|               | RY-element  | CATGCATG      | 1912 | - | cis-acting regulatory element involved in seed-specific regulation  |
|               | P-box       | CCTTTTG       | 2147 | - | gibberellin-responsive element                                      |
|               | HD-Zip 1    | CAAT(A/T)ATTG | 933  | + | element involved in differentiation of the palisade mesophyll cells |
|               | CGTCA-motif | CGTCA         | 646  | - | cis-acting regulatory element involved in the MeJA-responsiveness   |
|               | CGTCA-motif | CGTCA         | 1276 | - | cis-acting regulatory element involved in the MeJA-responsiveness   |
|               | TGACG-motif | TGACG         | 646  | + | cis-acting regulatory element involved in the MeJA-responsiveness   |
|               | TGACG-motif | TGACG         | 1276 | + | cis-acting regulatory element involved in the MeJA-responsiveness   |

**Table S2** List of the identified StUBC13 genes and their related information.

| Gene Name             | Accession number   | Protein/AA | Chrom                       | MW (Da)   | pI   | Instability index | GRAVY  |
|-----------------------|--------------------|------------|-----------------------------|-----------|------|-------------------|--------|
| StUBC35/StUBC13A      | Soltu.DM.10G002790 | 154AA      | chr10:2,214,883-2,220,030   | 17,189.85 | 6.74 | 49.90             | -0.303 |
| StUBC35/StUBC13A-like | Soltu.DM.01G001370 | 154AA      | chr07:53,662,738-53,668,499 | 17247.93  | 6.74 | 49.90             | -0.303 |

**Table S3 Positive clones from yeast two-hybrid screening and information of StUBC13 interaction proteins.**

| Clone No. | Description                                                                           | Potato code          | AGI code  |
|-----------|---------------------------------------------------------------------------------------|----------------------|-----------|
| 1         | Encodes a protein similar to adenylate kinase (ADK1)                                  | Soltu.DM.03G024600.1 | AT5G63400 |
| 2         | Histone deacetylase 8 (HDA8)                                                          | Soltu.DM.06G029470.1 | AT1G08460 |
| 3         | Nascent polypeptide-associated complex (NAC)                                          | Soltu.DM.10G026340.1 | AT3G12390 |
| 4         | UBQ10                                                                                 | Soltu.DM.10G001670.1 | AT4G05320 |
| 5         | RING domain ubiquitin E3 ligase, RGLG1(RING domain ligase 1)                          | Soltu.DM.09G020590.2 | AT5G63970 |
| 6         | Alkenal/one oxidoreductase (AOR)                                                      | Soltu.DM.05G008540.1 | AT1G23740 |
| 7         | Ubiquitin-activating enzyme (E1, UBA1)                                                | Soltu.DM.09G009000.1 | AT5G06460 |
| 8         | RING domain ubiquitin E3 ligase, RGLG2(RING domain ligase 2)                          | Soltu.DM.03G025320.1 | AT5G14420 |
| 9         | A protein involved in RNA splicing (SUM)                                              | Soltu.DM.07G006360   | AT2G26460 |
| 10        | nuclear factor Y, subunit A6                                                          | Soltu.DM.12G026000   | AT3G14020 |
| 11        | Encodes a subunit of CCAAT-binding complex (NFYA1)                                    | Soltu.DM.10G028300.2 | AT5G12840 |
| 12        | Pleckstrin homology (PH) domain-containing protein (SWAP70)                           | Soltu.DM.05G016700.1 | AT2G30880 |
| 13        | Encodes Ni <sup>+</sup> dependent glyoxalase I homolog ATGLX1 (GLX1)                  | Soltu.DM.02G020230.2 | AT1G11840 |
| 14        | Ribosomal protein S10p/S20e family protein                                            | Soltu.DM.01G035790.1 | AT5G62300 |
| 15        | Encodes a cytosolic phosphoglucosmutase (PGM)                                         | Soltu.DM.04G015010.1 | AT1G23190 |
| 16        | chaperone binding / ATPase activator                                                  | Soltu.DM.05G016210.1 | AT5G58110 |
| 17        | Encodes a Na <sup>+</sup> /Ca <sup>2+</sup> exchanger-like protein (NCL)              | Soltu.DM.07G023870.1 | AT1G53210 |
| 18        | heat shock protein 70 (HSP70)                                                         | Soltu.DM.09G002330.1 | AT3G12580 |
| 19        | EF hand domain protein encodes a calmodulin (CAM7)                                    | Soltu.DM.10G026220.2 | AT3G43810 |
| 20        | NAD(P)-linked oxidoreductase superfamily protein                                      | Soltu.DM.01G050290   | AT2G21250 |
| 21        | Cysteine proteinase precursor-like protein/ dehydration stress-responsive gene (RD21) | Soltu.DM.12G005880.1 | AT1G47128 |
| 22        | Cysteine proteinase precursor-like protein/ dehydration stress-responsive gene (RD21) | Soltu.DM.12G005890.1 | AT1G47128 |
| 23        | Ubiquitin E3 ligase LOG2 (LOSS OF GDU2)                                               | Soltu.DM.09G005970.1 | AT3G09770 |
| 24        | U-box type E3 ubiquitin ligase (PUB40)                                                | Soltu.DM.02G032560.1 | AT5G40140 |
| 25        | MMS ZWEI homologue (UEV1B)                                                            | Soltu.DM.04G003350   | AT1G70660 |

**Table S4** Sequences of the primers used in this study.

| Gene                                 | Forward primer sequence                               | Reverse primer sequence                                  |
|--------------------------------------|-------------------------------------------------------|----------------------------------------------------------|
| Primers for yeast two-hybrid assays  |                                                       |                                                          |
| pGBKT7-StUBC13                       | CATGGAGGCCGAATCCCGGGCCC<br>TTAGCGTAAACTCTGCGA         | CTAGTTATGCGGCCGCTGCAGTGATA<br>GCAGCTGCAGCAACACT          |
| pGADT7-StLOG2                        | GCCATGGAGGCCAGTGAATTCATG<br>GGTAATATGGGAAGTAGTGGTG    | CAGCTCGAGCTCGATGGATCCCTACT<br>CTTCGGCTGCGCCT             |
| pGADT7-StRGL1                        | GCCATGGAGGCCAGTGAATTCATG<br>GGGAATCAAGAGTCTGCC        | CAGCTCGAGCTCGATGGATCCCTAGC<br>TATATAGTCTTATGCGAGTTTAAATG |
| pGADT7-StRGL2                        | GCCATGGAGGCCAGTGAATTCATG<br>GGTGGCAAGAGTTCAAAGA       | CAGCTCGAGCTCGATGGATCCTCAGT<br>AAAGTCTTATCCTAGTTTGAATACTG |
| pGADT7-StCAM7                        | CCATGGAGGCCAGTGAATTCATGG<br>CAGATCAGCTCACCGATG        | CGATTCATCTGCAGCTCGAGTCACTT<br>GGCCATCATGAC               |
| pGADT7-StS6PDH                       | CCATGGAGGCCAGTGAATTCATGG<br>CGATAAACTGAAGAG           | CGATTCATCTGCAGCTCGAGTTAGGC<br>ATACAGATCTATG              |
| pGADT7-StUEV1B                       | CCATGGAGGCCAGTGAATTCATGG<br>GGTCAGAAGGATCATC          | CGATTCATCTGCAGCTCGAGTTACAT<br>AATGCAGCATTTTC             |
| StUEV1D-like1                        | GACGTACCAGATTACGCTCATATGA<br>CTCTTGGTTCAGGAGG         | CAGCTCGAGCTCGATGGATCCCTAG<br>AAATAGGTGCCTTC              |
| StUEV1D-like                         | CCATGGAGGCCAGTGAATTCATGA<br>CGCTTGGTTCAGGAGG          | CGATTCATCTGCAGCTCGAGGAAAC<br>AGGTGCCTTCGGGTG             |
| StNCL                                | GACGTACCAGATTACGCTCATATGA<br>TGAAAAAATCTCCAAATATGTTCC | CAGCTCGAGCTCGATGGATCCCTATG<br>ACCAACCAAAGACGTA           |
| StRD21                               | GACGTACCAGATTACGCTCATATGA<br>TGGCAGCTCACAGCTCAAC      | CAGCTCGAGCTCGATGGATCCACTTA<br>CTCTATTGCTTTTGTGTA         |
| StNF-YA6                             | GACGTACCAGATTACGCTCATATGA<br>TGAAGTCTTTGGATCCGGACT    | CAGCTCGAGCTCGATGGATCCCTCACC<br>GGACAACCTGGAGCAC          |
| Primers for subcellular localization |                                                       |                                                          |
| StUEV1B-EGFP                         | GAGCTCGGTACCCGGGGATCCATG<br>GGGTCAGAAGGATCATC         | GCCCTTGCTCACCATGTCGACCATAA<br>TGCAGCATTTCACTAG           |
| StUBC13-EGFP                         | GAGCTCGGTACCCGGGGATCCATG<br>GCTAACAGCAATCTTCCTCGA     | GCCCTTGCTCACCATGTCGACTCATG<br>CACCCTAGCATATAGGCG         |

|                  |                                                   |                                                        |
|------------------|---------------------------------------------------|--------------------------------------------------------|
| StRGLG1-EGFP     | GAGCTCGGTACCCGGGGATCCATG<br>GGGAATCAAGAGTCTGCC    | GCCCTTGCTCACCATGTCGACGCTAT<br>ATAGTCTTATGCGAGTTTTAATGG |
| Primers for BiFC |                                                   |                                                        |
| pSPYNE-StUEV1B   | GGCGCGCCACTAGTGGATCCATGG<br>GGTCAGAAGGATCATC      | GCGGTACCCTCGAGGTCGACCATAAT<br>GCAGCATTTTC              |
| pSPYCE-StUBC13   | GGCGCGCCACTAGTGGATCCATGG<br>CTAACAGCAATCTTCCTCGA  | GCGGTACCCTCGAGGTCGACTCATG<br>CACCCTAGCATATAGGCG        |
| pSPYNE-StRGLG1   | GGCGCGCCACTAGTGGATCCATGG<br>GGGAATCAAGAGTCTGCC    | GCGGTACCCTCGAGGTCGACGCTATA<br>TAGTCTTATGCGAGTTTTAATGG  |
| Primers for SLC  |                                                   |                                                        |
| StUEV1B-NLuc     | CGAGCTCGGTACCCGGGATCCATG<br>GGGTCAGAAGGATCATC     | CGCGTACGAGATCTGGTCGACCATAA<br>TGCAGCATTTTCACAACT       |
| StUBC13-CLuc     | TACGCGTCCCGGGGCGGTACCATG<br>GCTAACAGCAATCTTCCTCGA | TGGCGCGCCGGGCCCTCTAGATCATG<br>CACCCTAGCATATAGGCG       |
| StRGLG1-NLuc     | CGAGCTCGGTACCCGGGATCCATG<br>GGGAATCAAGAGTCTGCC    | CGCGTACGAGATCTGGTCGACGCTAT<br>ATAGTCTTATGCGAGTTTTAATGG |
